# Supplementary material for: Tunable heteroassembly of 2D CoNi LDH and Ti 3 C 2 nanosheets with enhanced electrocatalytic activity for oxygen evolution
Source: Royal Society of Chemistry journal article supplement (doi:10.1039/d4nr03679d), 2024-11-20
Supplement: d4nr03679d1.pdf [file d4nr03679d1.pdf]

## Supporting information

### Tunable Heteroassembly of 2D CoNi LDH and Ti<sub>3</sub>C<sub>2</sub> Nanosheets with Enhanced Electrocatalytic Activity for Oxygen Evolution

Xueyi Lu,<sup>a,‡</sup> Lulu Jia,<sup>b,‡</sup> Minchen Hou,<sup>a</sup> Xuemin Wu,<sup>a</sup> Chang Ni,<sup>a</sup>

Gaofei Xiao,<sup>a,\*</sup> Renzhi Ma,<sup>b,\*</sup>, and Xia Lu<sup>a,\*</sup>

<sup>a</sup>School of Materials, Sun Yat-sen University, Shenzhen 518107, P. R. China

<sup>b</sup>Research Center for Materials Nanoarchitectonics, National Institute for Materials Science,  
Namiki 1-1, Tsukuba 305-0044, Japan

<sup>‡</sup>These authors contribute equally to this work.

E-mails: [xiaogf@mail.sysu.edu.cn](mailto:xiaogf@mail.sysu.edu.cn); [MA.Renzhi@nims.go.jp](mailto:MA.Renzhi@nims.go.jp); [luxia3@mail.sysu.edu.cn](mailto:luxia3@mail.sysu.edu.cn)

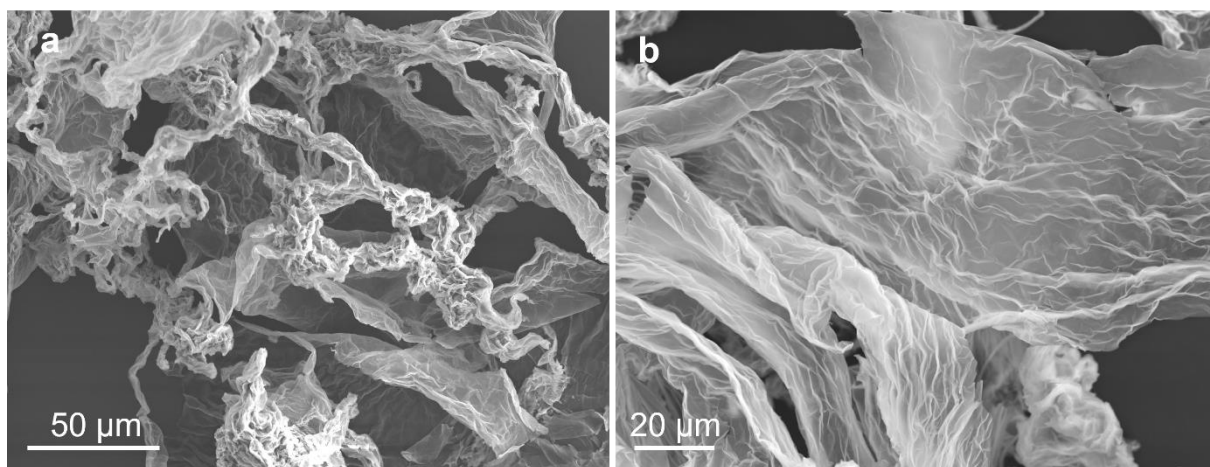

Figure S1. SEM images of CoNi LDH nanosheets after freeze drying.

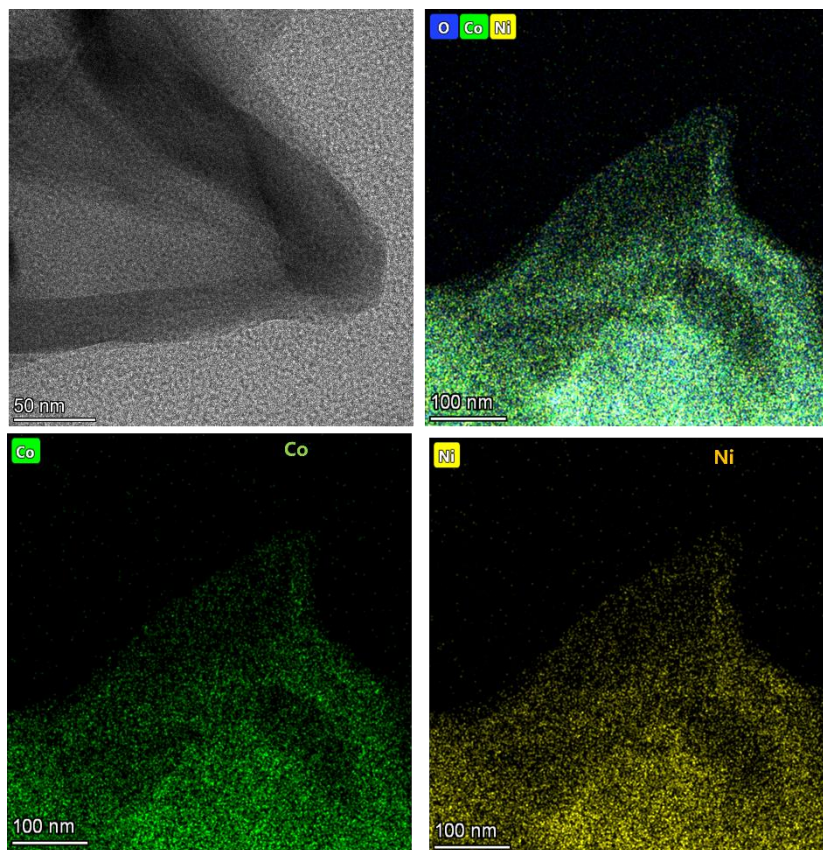

Figure S2. TEM image and elemental mappings of CoNi LDH nanosheets after exfoliation.

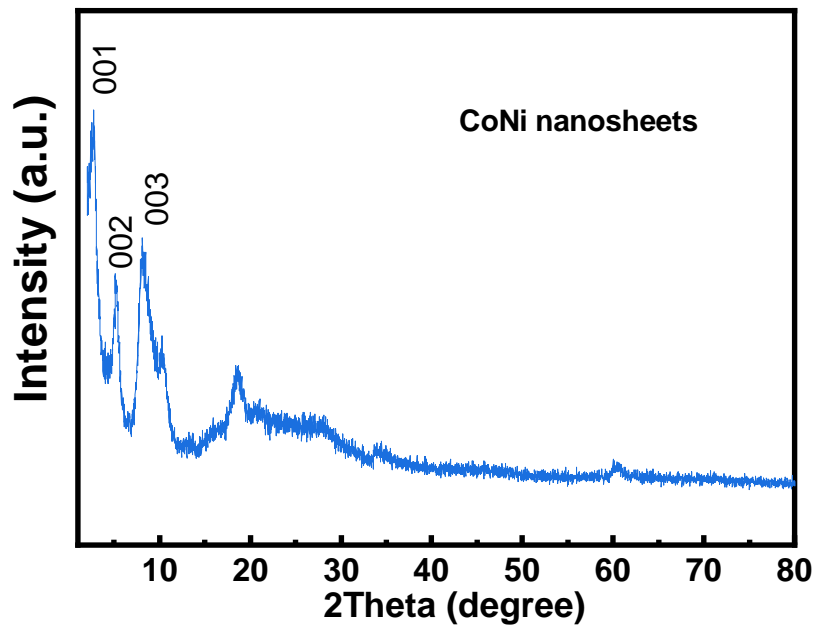

Figure S3. XRD pattern of CoNi LDH nanosheets after freeze drying.

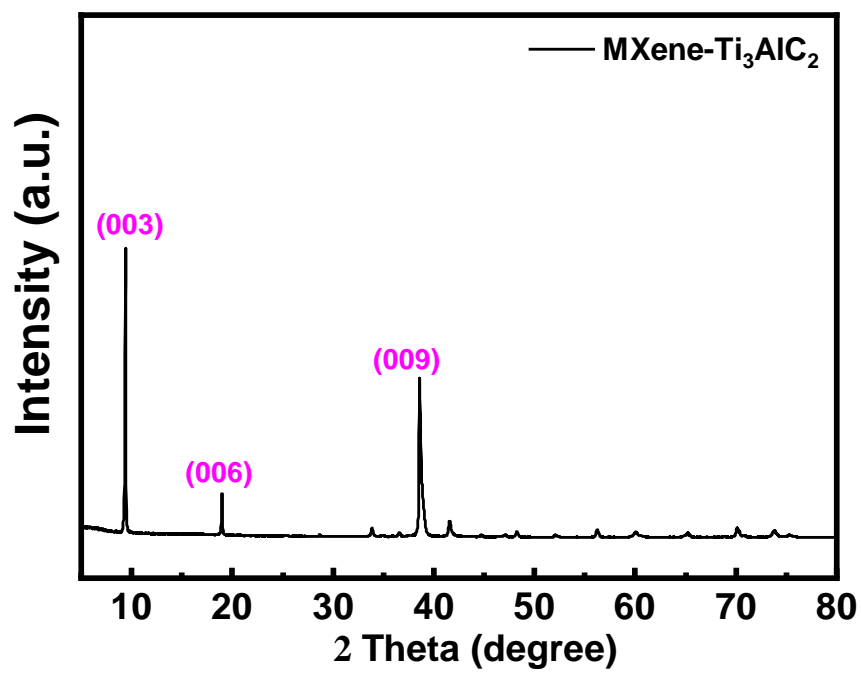

Figure S4. XRD pattern of the multilayered Ti<sub>3</sub>AlC<sub>2</sub> MAX.

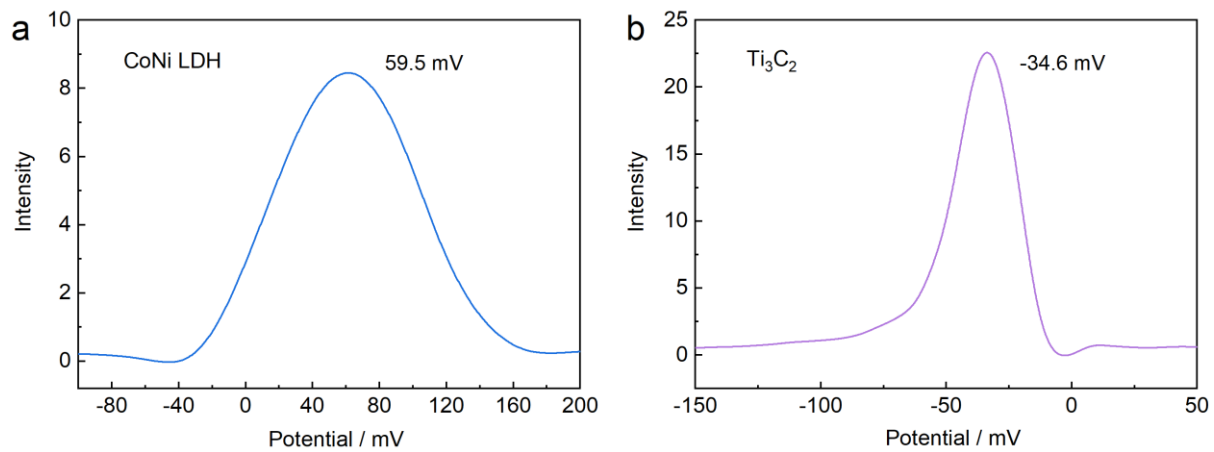

Figure S5. Zeta potential profiles of CoNi LDH and Ti<sub>3</sub>C<sub>2</sub> nanosheet dispersion.

### CoNi nanosheets

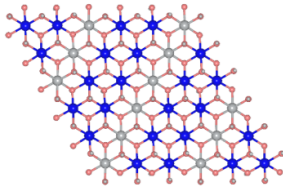

2D weight density:

$$W_{(\text{LDH})} = M_{(\text{LDH})} / (a \times a \times \sin 120^\circ \times N_A)$$

$$\text{unit cell } a = 0.307 \text{ nm} \quad N_A = 6.02 \times 10^{23} \text{ mol}^{-1}$$

$$M_{(\text{LDH})} = \text{Co}_{0.67}\text{Ni}_{0.33}(\text{OH})_{0.8}\text{DS}_{0.2} \cdot 0.76 \text{ H}_2\text{O} = 154.4 \text{ g mol}^{-1}$$

### Ti<sub>3</sub>C<sub>2</sub> nanosheets

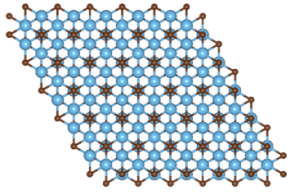

$$W_{(\text{Ti}_3\text{C}_2\text{T}_x)} = M_{(\text{Ti}_3\text{C}_2\text{T}_x)} / (a \times a \times \sin 120^\circ \times N_A)$$

$$a = 0.305 \text{ nm} \quad N_A = 6.02 \times 10^{23} \text{ mol}^{-1}$$

$$M_{(\text{Ti}_3\text{C}_2\text{T}_x)} = 167 \text{ g mol}^{-1}$$

$$m_{(\text{LDH})} / m_{(\text{Ti}_3\text{C}_2\text{T}_x)} = W_{(\text{LDH})} / W_{(\text{Ti}_3\text{C}_2\text{T}_x)} \approx 0.92$$

Figure S6. Crystal structure of monolayer CoNi LDH and Ti<sub>3</sub>C<sub>2</sub> nanosheets and the area match model for design of the heterostructures.

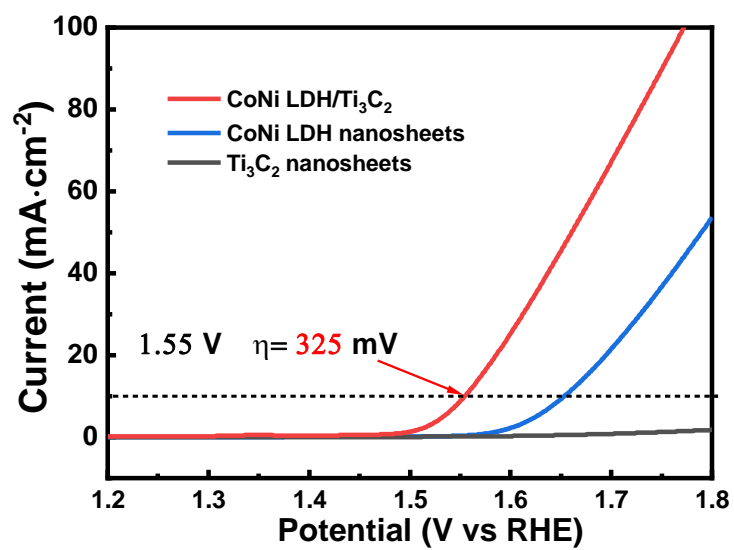

Figure S7. LSV curves for CoNi LDH, Ti<sub>3</sub>C<sub>2</sub> nanosheets and CoNi LDH/Ti<sub>3</sub>C<sub>2</sub> materials.



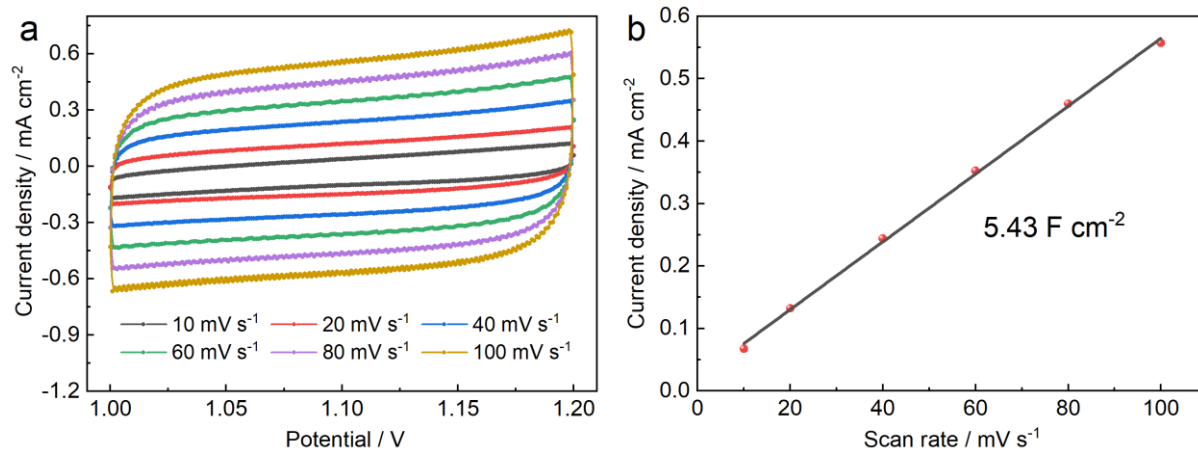

Figure S8. CV profiles of CoNi LDH/Ti<sub>3</sub>C<sub>2</sub> at various scan rates and the capacitive currents at 1.1 V plotted as a function of scan rate.

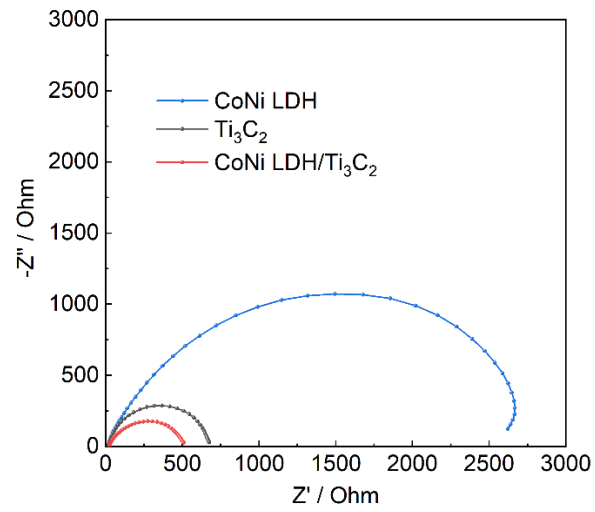

Figure S9. EIS spectra of CoNi LDH, Ti<sub>3</sub>C<sub>2</sub> and CoNi LDH/Ti<sub>3</sub>C<sub>2</sub> superlattice heterostructures.

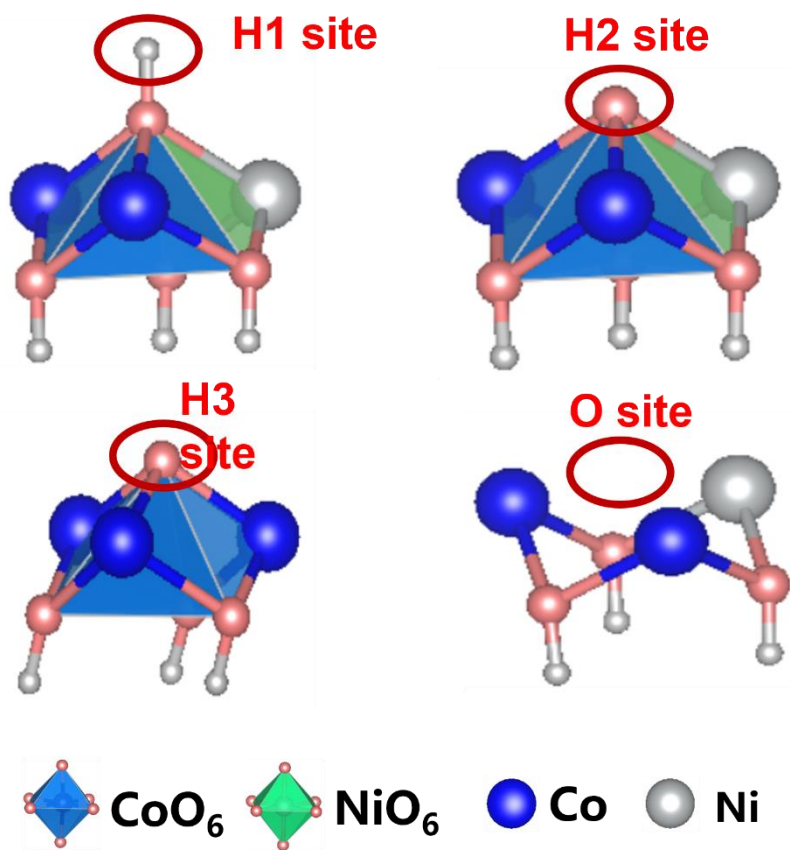

Figure S10. Different active site positions at the CoNi LDH/Ti<sub>3</sub>C<sub>2</sub> interface.

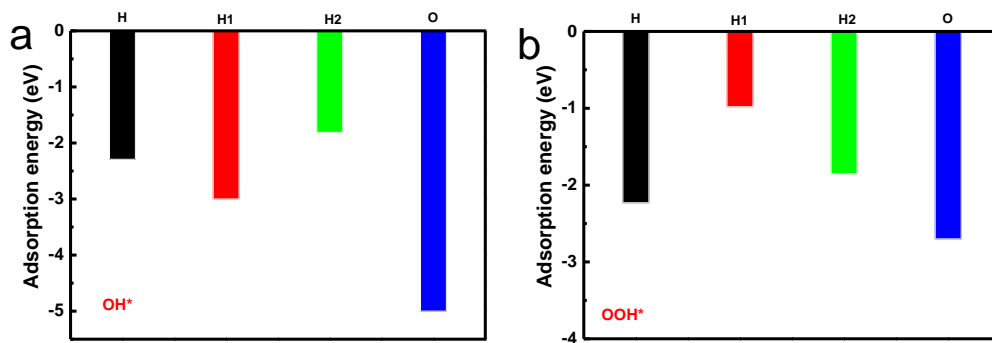

Figure S11. Adsorption energies of different active sites for the intermediates (OH\* and OOH) of the OER reaction.

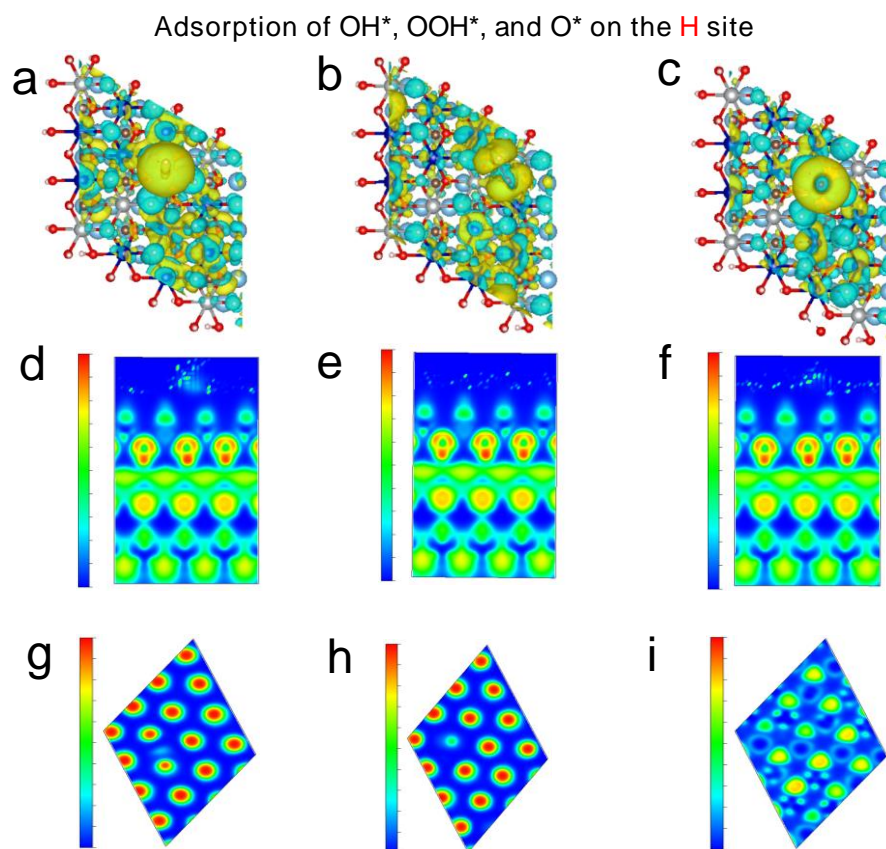

Figure S12. Electron localization function (a-c) and charge density difference (d-i) diagrams for the adsorption of OH\* (a, d, f), OOH\* (b, e, h), and O\* (c, f, i) on the H site.

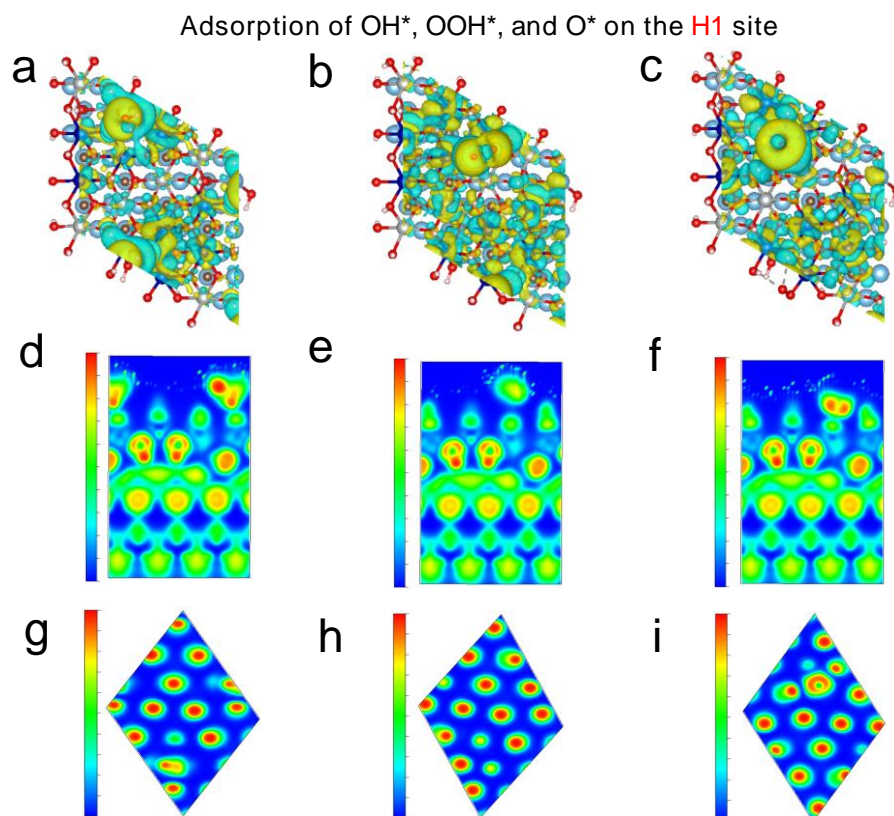

Figure S13. Electron localization function (a-c) and charge density difference (d-i) diagrams for the adsorption of OH\* (a, d, f), OOH\* (b, e, h), and O\* (c, f, i) on the H1 site.

Adsorption of OH\*, OOH\*, and O\* on the H2 site

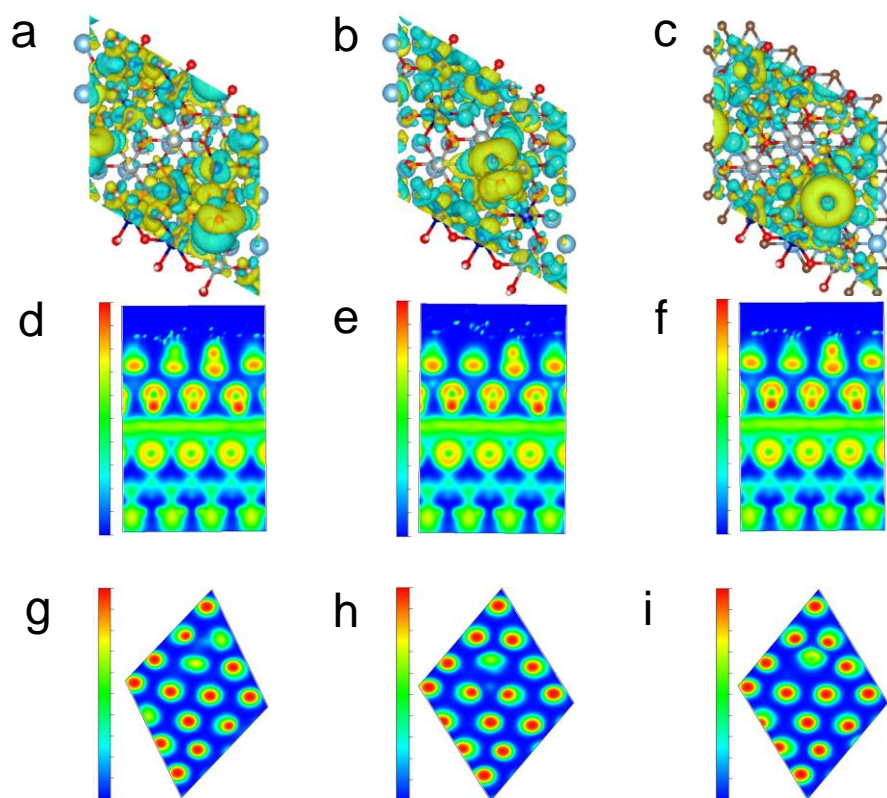

Figure S14. Electron localization function (a-c) and charge density difference (d-i) diagrams for the adsorption of OH\* (a, d, f), OOH\* (b, e, h), and O\* (c, f, i) on the H2 site.

Adsorption of OH\*, OOH\*, and O\* on the O site

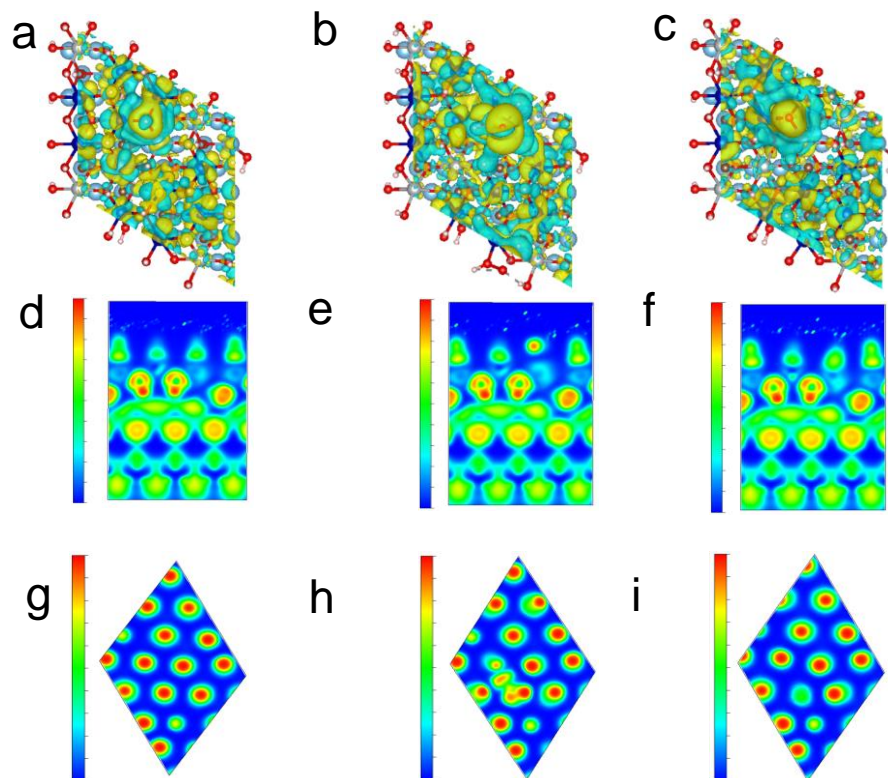

Figure S15. Electron localization function (a-c) and charge density difference (d-i) diagrams for the adsorption of OH\* (a, d, f), OOH\* (b, e, h), and O\* (c, f, i) on the O site.
